# Supplementary material for: Increased expression of CDKN1A/p21 in HIV-1 controllers is correlated with upregulation of ZC3H12A/MCPIP1
Source: PubMed Central journal article supplement (PMC7333275; doi:10.1186/s12977-020-00522-4), 2020-07-02
Supplement: 12977_2020_522_MOESM1_ESM.pdf [file 12977_2020_522_MOESM1_ESM.pdf]

## *Additional File*

### **Increased expression of CDKN1A/p21 in HIV-1 controllers is correlated with upregulation of ZC3H12A/MCPIP1**

Suwellen S. D. de Azevedo<sup>1\*</sup>, Marcelo Ribeiro-Alves<sup>2</sup>, Fernanda H. Côrtes<sup>1</sup>, Edson Delatorre<sup>3</sup>, Lucia Spangenberg<sup>4,5</sup>, Hugo Naya<sup>5,6</sup>, Leonardo N. Seito<sup>7</sup>, Brenda Hoagland<sup>2</sup>, Beatriz Grinsztejn<sup>2</sup>, Valdilea G. Veloso<sup>2</sup>, Mariza G. Morgado<sup>1</sup>, Thiago Moreno L. Souza<sup>8,9</sup>, and Gonzalo Bello<sup>1</sup>

1 Laboratório de AIDS & Imunologia Molecular. Instituto Oswaldo Cruz – IOC, FIOCRUZ. Rio de Janeiro, Brazil.

2 Laboratório de Pesquisa Clínica em DST-AIDS. Instituto Nacional de Infectologia Evandro Chagas - INI, FIOCRUZ. Rio de Janeiro, Brazil.

3 Departamento de Biologia, Centro de Ciências Exatas, Naturais e da Saúde, Universidade Federal do Espírito Santo. Alegre, Brazil.

4 Unidad de Bioinformática, Institut Pasteur Montevideo. Montevideo, Uruguay.

5 Departamento de Informática y Ciencias de la Computación, Facultad de Ingeniería y Tecnologías, Universidad Católica del Uruguay, Montevideo, Uruguay.

6 Departamento de Producción Animal y Pasturas, Facultad de Agronomía, Universidad de la República, Montevideo, Uruguay.

7 Laboratório de Farmacologia Aplicada. Instituto de Tecnologia em Fármacos – Farmanguinhos, FIOCRUZ, Rio de Janeiro, Brazil.

8 National Institute for Science and Technology on Innovation on Diseases of Neglected Populations (INCT/IDPN), Center for Technological Development in Health – CDTS, FIOCRUZ. Rio de Janeiro, Brazil.

9 Laboratório de Imunofarmacologia. Instituto Oswaldo Cruz – IOC, FIOCRUZ. Rio de Janeiro, Brazil.

\* **Corresponding author:** Suwellen de Azevedo. Lab. de AIDS & Imunologia Molecular. Instituto Oswaldo Cruz –FIOCRUZ. Av. Brasil 4365, 21045-900 Rio de Janeiro, RJ, Brasil. E-mail: [suwellen@ioc.fiocruz.br](mailto:suwellen@ioc.fiocruz.br)/[suwellendias@gmail.com](mailto:suwellendias@gmail.com)

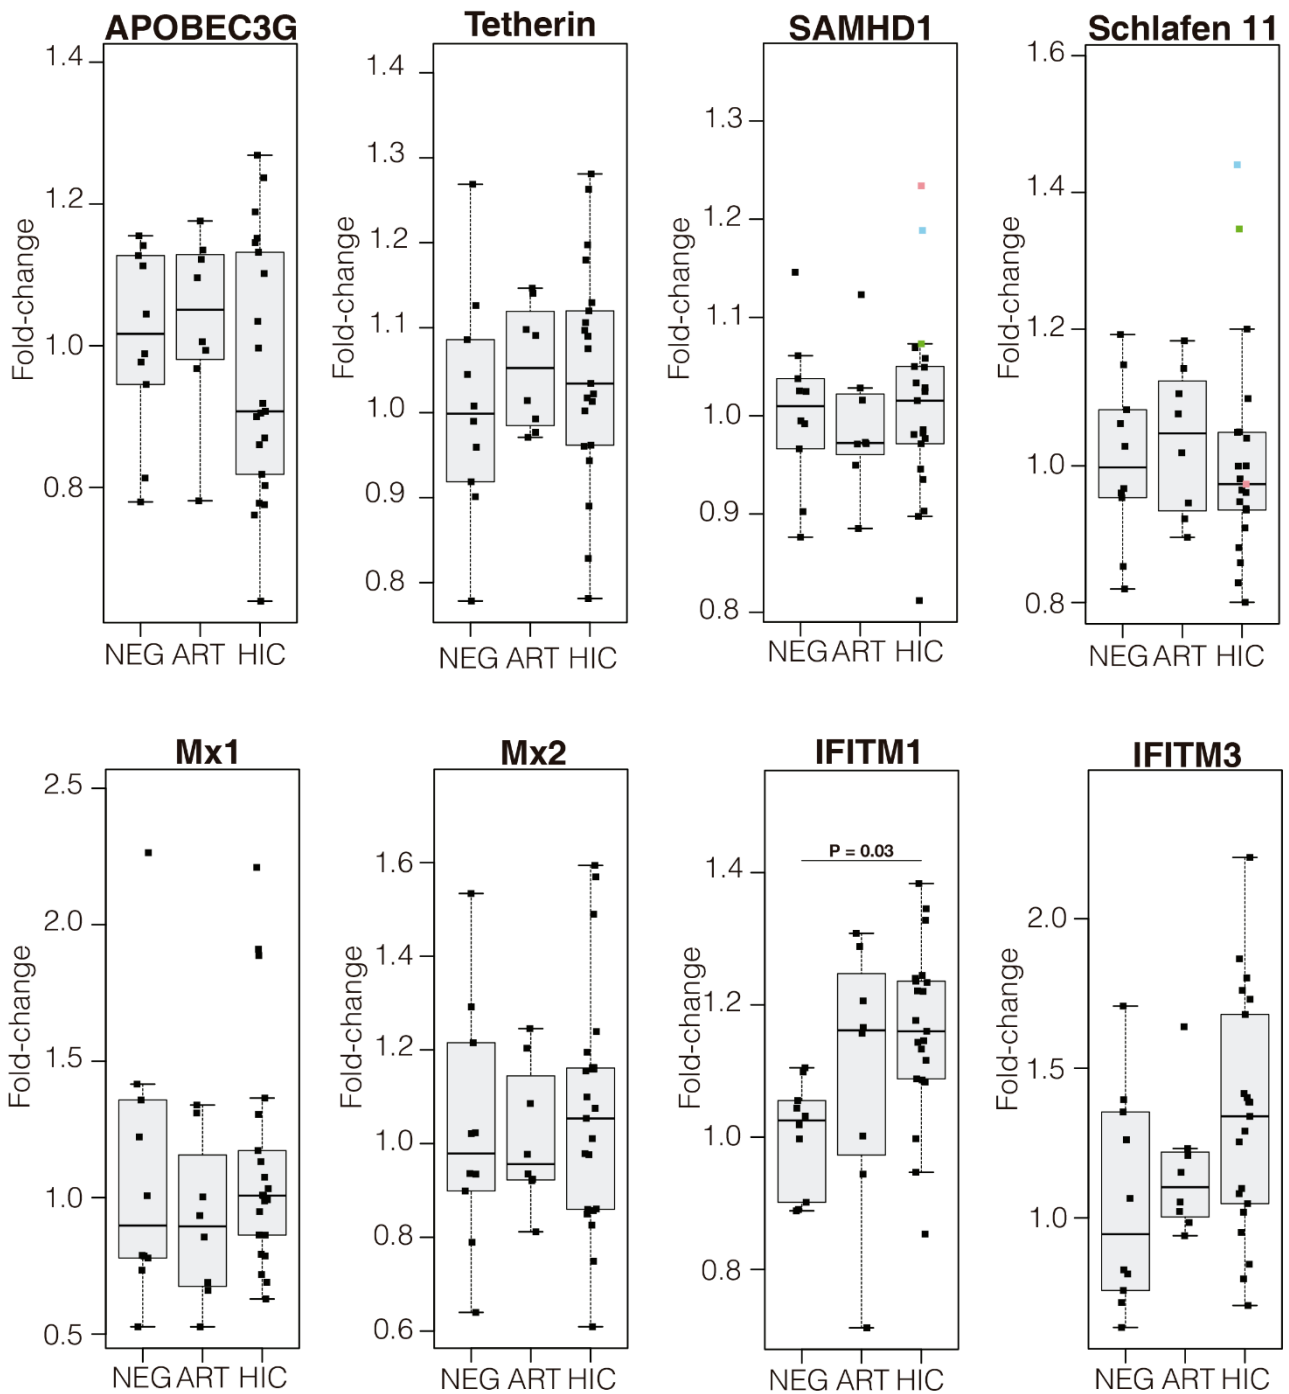

**Figure S1.** Boxplots represent the interquartile and sample median (central solid black line) of the relative changes (fold-change values relative to the mean of HIV-1-uninfected (NEG) subjects) of different restriction factor comparing NEG and ART-suppressed subjects (ART) with HIV controllers (HIC). The RF's names used in the analysis are indicated above each graph. HIC exhibited statistically significant differences (P-values < 0.05) with respect to NEG group only for IFITM1. The colored squares (one per individual) in SAMHD1 and Schlafen 11 from HIC represent individuals with mRNA levels well above the normal range in one or both RF.

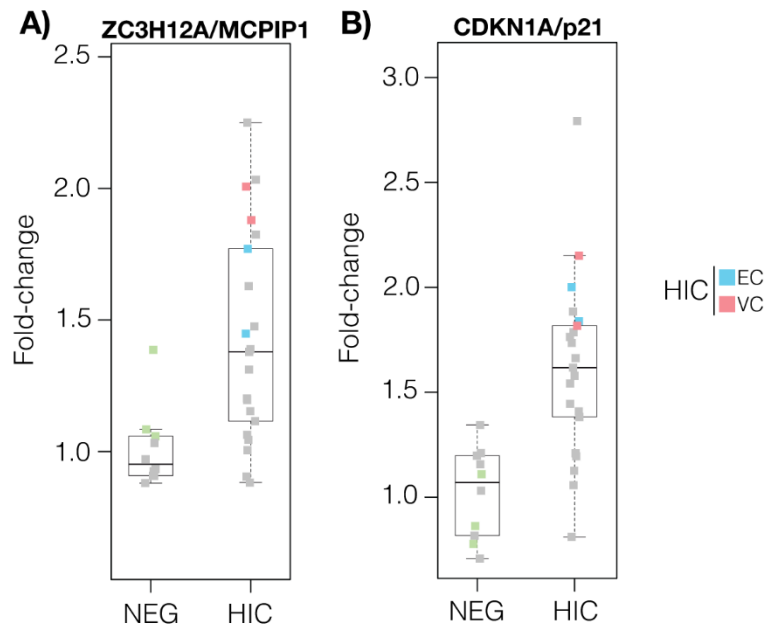

**Figure S2.** Samples chosen for analysis of MCPIP1 and p21 protein expression. Boxplots represent the interquartile and sample median (central solid black line) of the relative changes (fold-change values relative to the mean of HIV-1-uninfected (NEG) subjects) of ZC3H12A/MCPIP1 (A) and CDKN1A/p21 (B) expression. The colored squares represent the samples chosen for the western blot assay in the negative and HIC groups.

A)

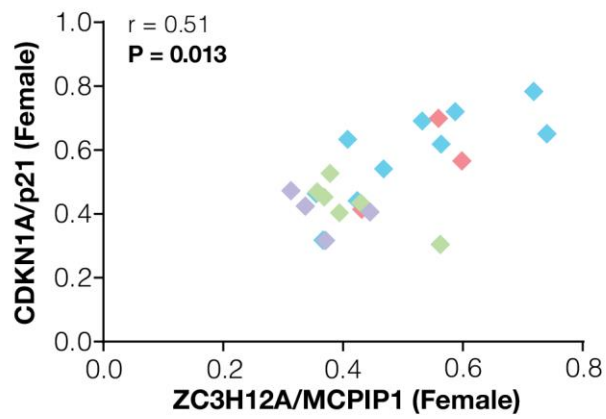

B)

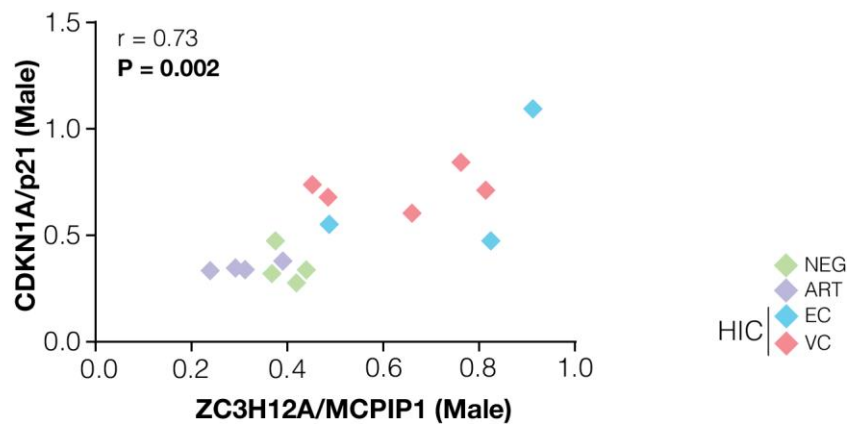

**Figure S3.** ZC3H12A/MCPIP1 and CDKN1A/p21 mRNA levels in PBMC are positively correlated, regardless of sex. The MCPIP1 and p21 normalized expression correlations were calculated considering all groups. The points' colors indicate the patient group, accordingly to the legend. Correlation coefficients (Spearman's  $\rho$ ) are shown in the upper left corner of each graph. P-values  $< 0.05$  were considered statistically significant.

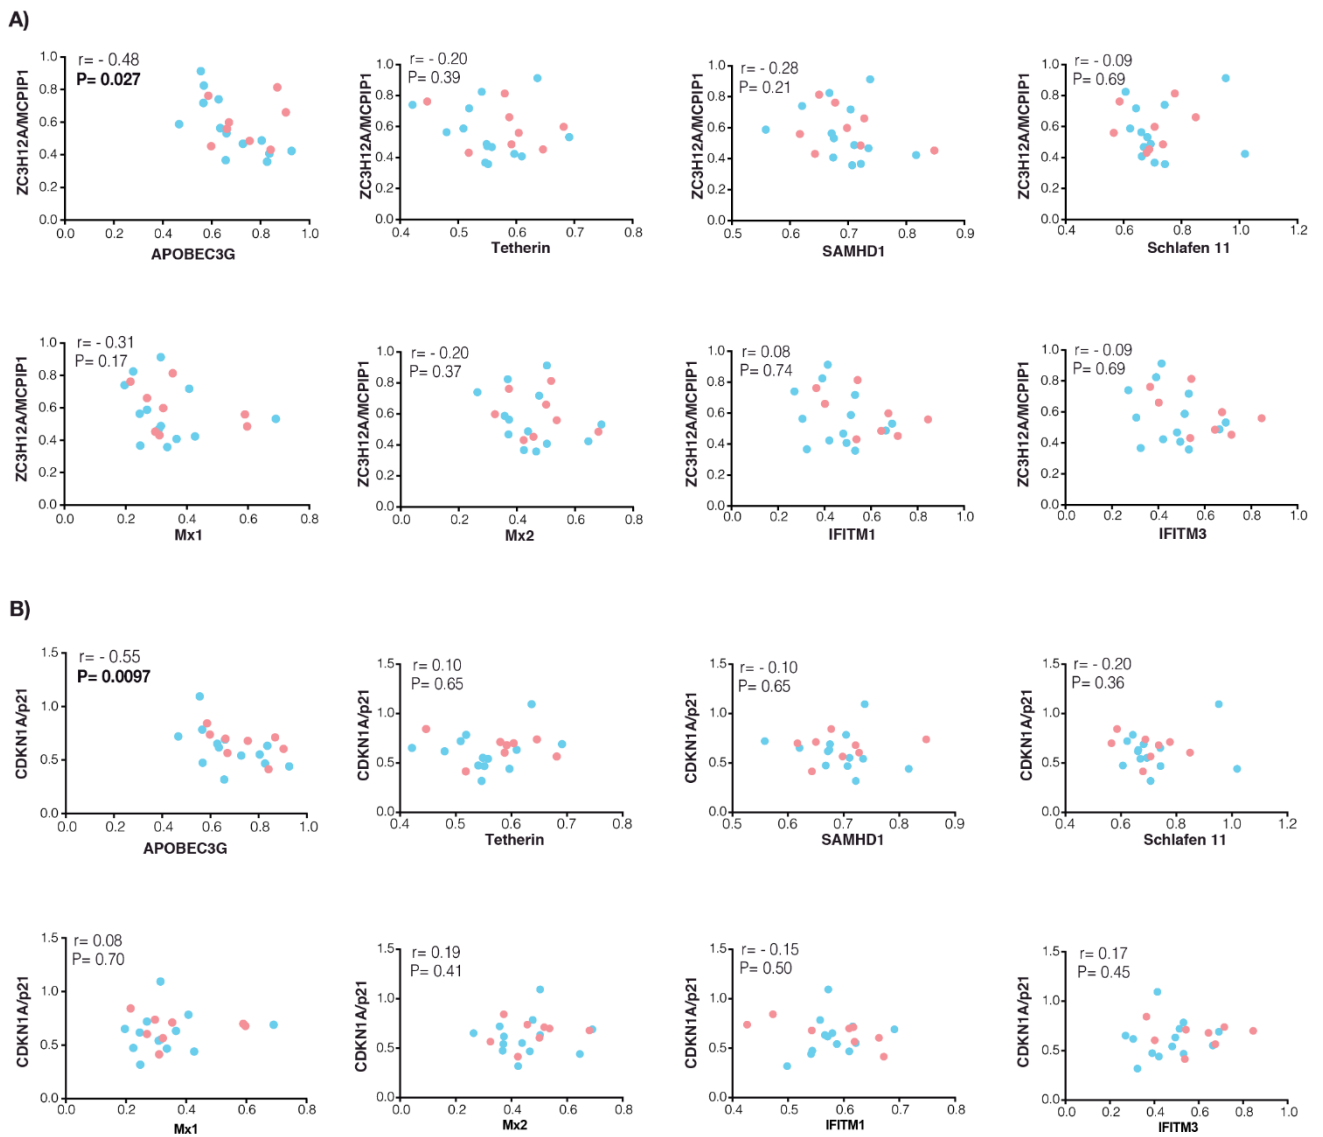

**Figure S4.** Correlations between normalized expression levels of ZC3H12A/MCPIP1 (A) and CDKN1A/p21 (B) with several anti-HIV-1 restriction factors (RF) in HIC. Blue points represent values from elite controllers while the red ones represent values from viremic controllers. The RF's names used in the correlation are indicated on the x-axis and the corresponding correlation coefficient (Spearman's rho) are shown in each graph.

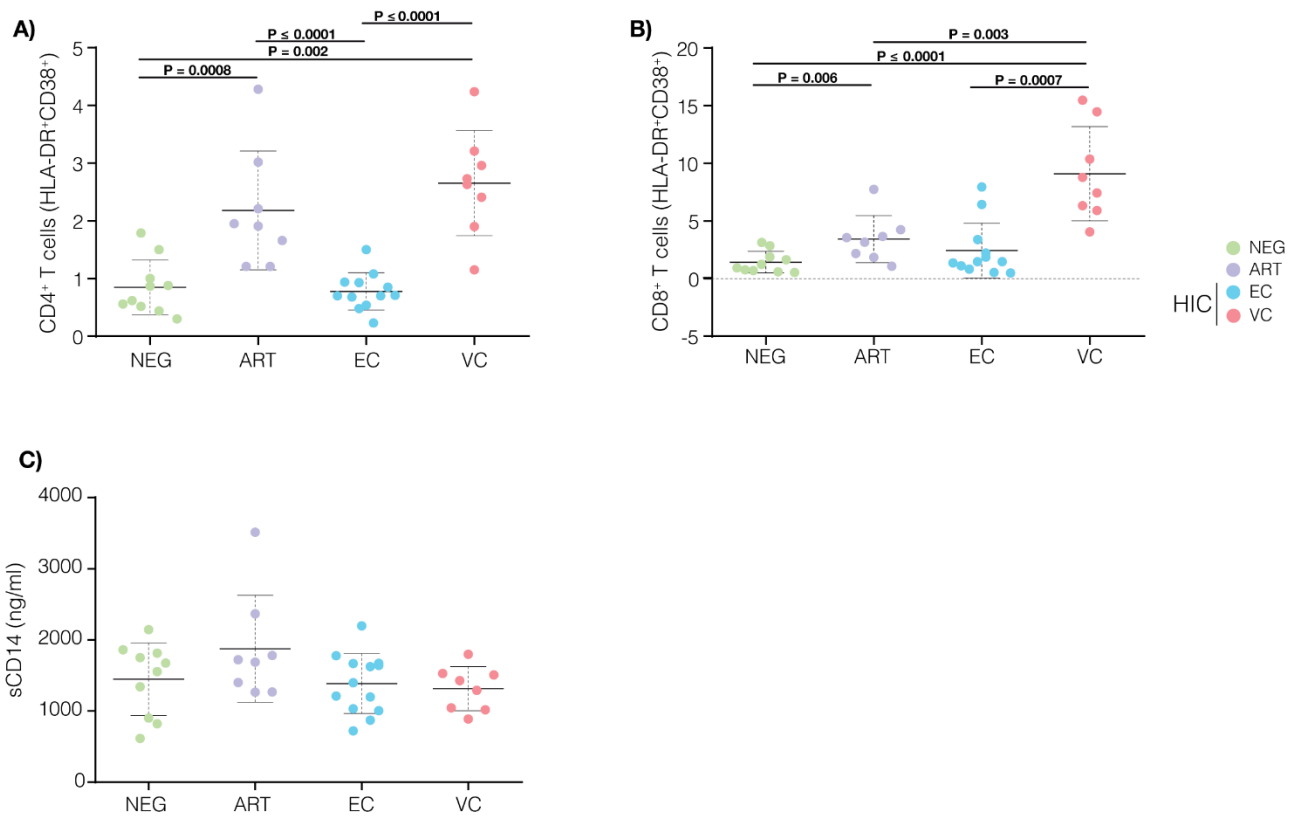

**Figure S5.** The mean of activated CD4<sup>+</sup> T cells (HLA-DR<sup>+</sup>CD38<sup>+</sup>) counts (A), activated CD8<sup>+</sup> T cells (HLA-DR<sup>+</sup>CD38<sup>+</sup>) counts (B), and soluble CD14 (sCD14) in plasma (C) were compared for each group. The color of each dot represents the group as indicated in the legend at right. P-values < 0.05 were considered statistically significant.

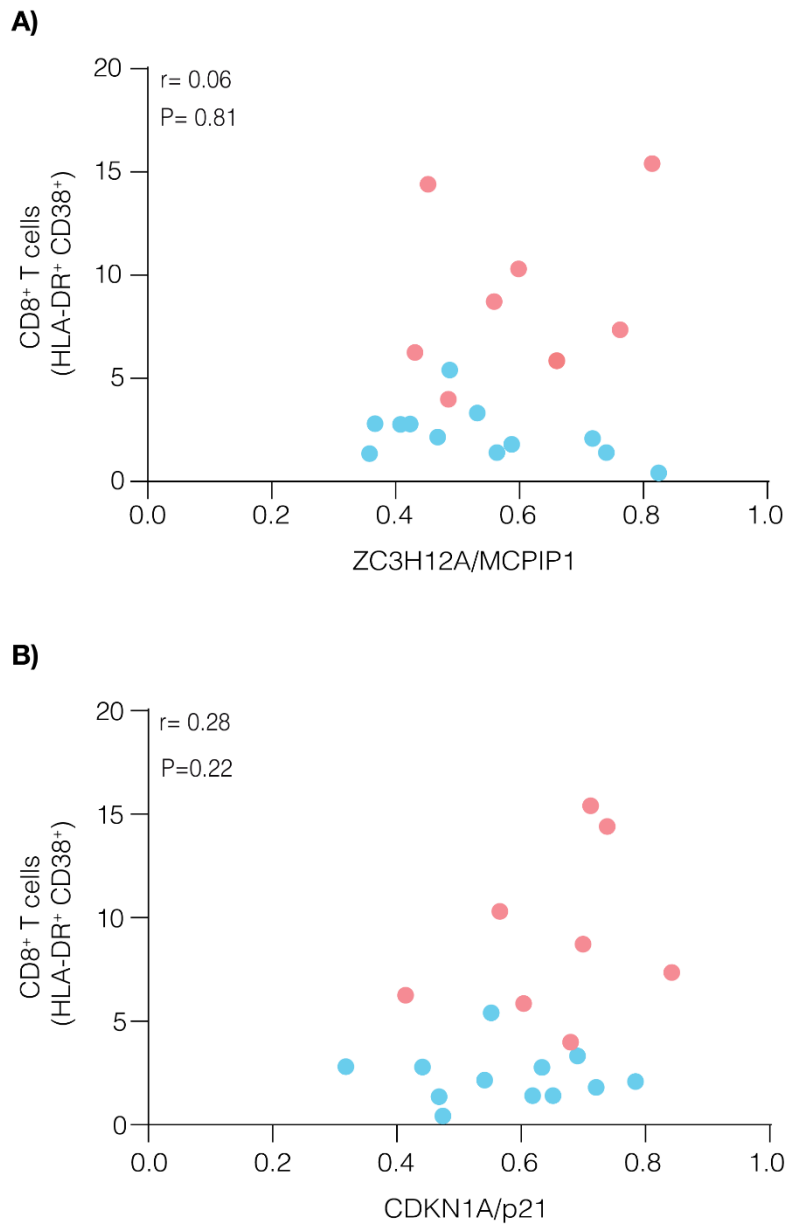

**Figure S6.** ZC3H12A/MCPIP1 and CDKN1A/p21 are not correlated with CD8<sup>+</sup> T cell in HIC individuals. Correlations were made evaluating the relationship between activated CD8<sup>+</sup> T cells levels with the normalized expression of ZC3H12A/MCPIP1 (A) and CDKN1A/p21 (B). Blue points represent values from elite controllers while the red ones represent values from viremic controllers. The correlation coefficient (Spearman's rho) are shown in the left corner.

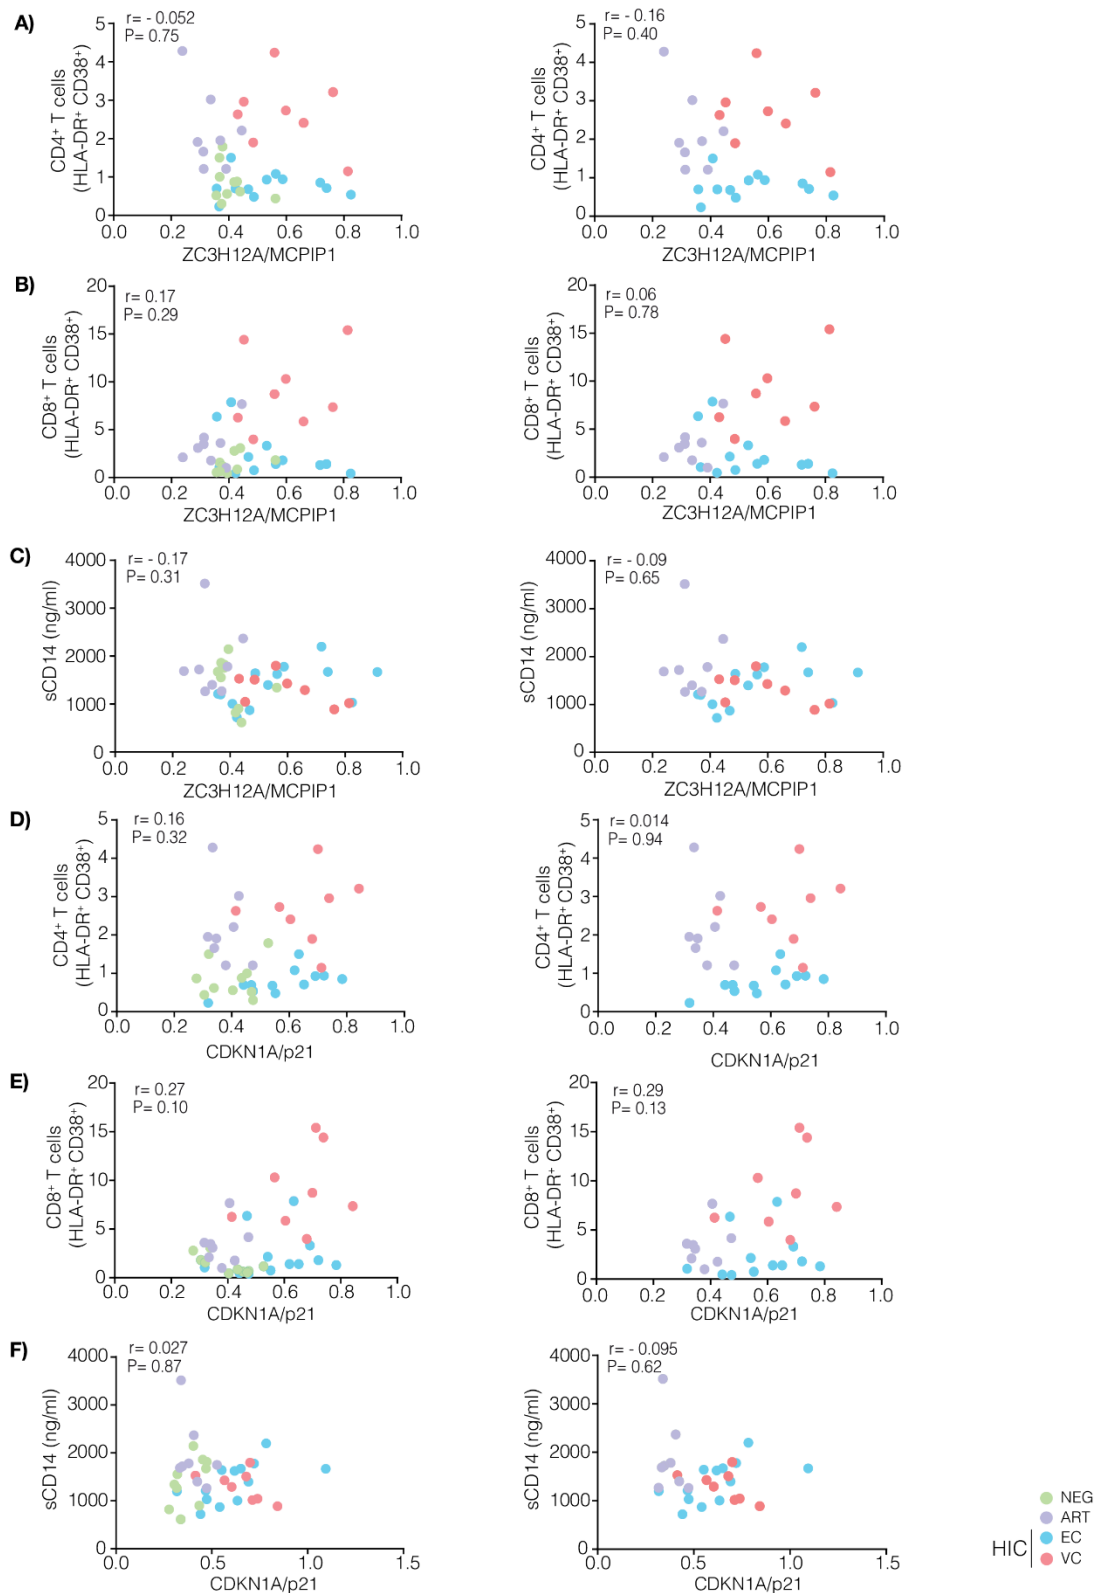

**Figure S7.** ZC3H12A/MCPIP1 and CDKN1A/p21 are not correlated with CD4<sup>+</sup>/CD8<sup>+</sup> T cell, and monocyte activation in all groups and in HIV-1 infected individuals. Correlations were made evaluating the relationship between activated CD4<sup>+</sup>, CD8<sup>+</sup> T cells or sCD14 levels with the normalized expression of ZC3H12A/MCPIP1 (A, B, and C, respectively) and CDKN1A/p21 (D, E and F, respectively) for different combinations of groups. The points' colors present in each graph indicate the groups present according to the legend. The correlation coefficient (Spearman's rho) are shown in the left corner.



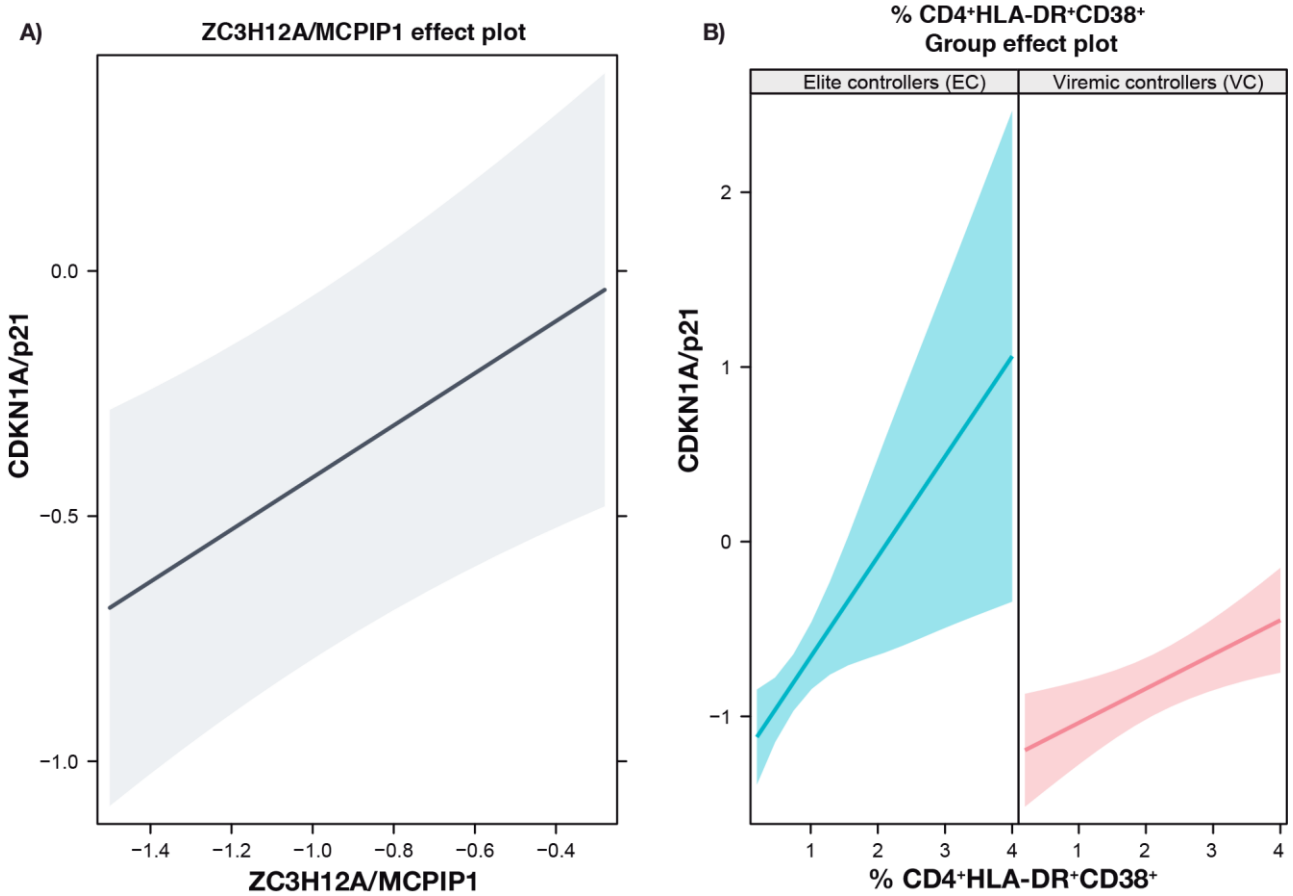

**Figure S8.** ZC3H12A/MCPIP1 and the frequency of CD4<sup>+</sup>HLA-DR<sup>+</sup>CD38<sup>+</sup> T cells upregulate CDKN1A/p21 mRNA levels in PBMC from HIC. Effects plots demonstrating (A) the upregulation of ZC3H12A/MCPIP1 is positively associated with the increase of the expression of CDKN1A/p21 in PBMC from HIC; while in (B) the frequency of CD4<sup>+</sup>HLA-DR<sup>+</sup>CD38<sup>+</sup> T cells is positively associated with the increase of the expression of CDKN1A/p21 in PBMC from both elite (EC) and viremic (VC) controllers, and this increase of the p21 expression was down-regulated by the increase of CD4<sup>+</sup>HLA-DR<sup>+</sup>CD38<sup>+</sup> T cells in VC when compared to EC individuals. P-values < 0.05 were considered statistically significant.

### A) Total CD8<sup>+</sup> T cells

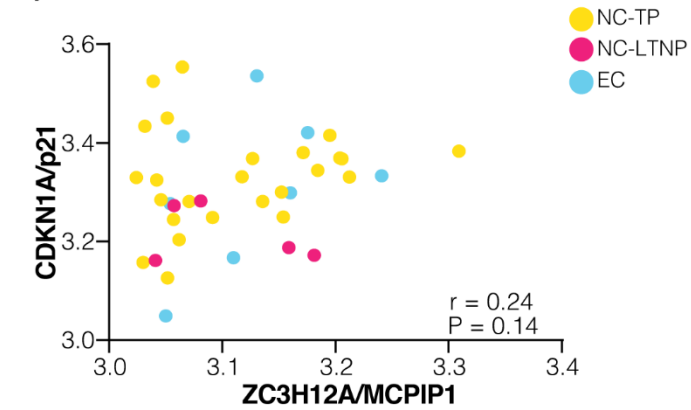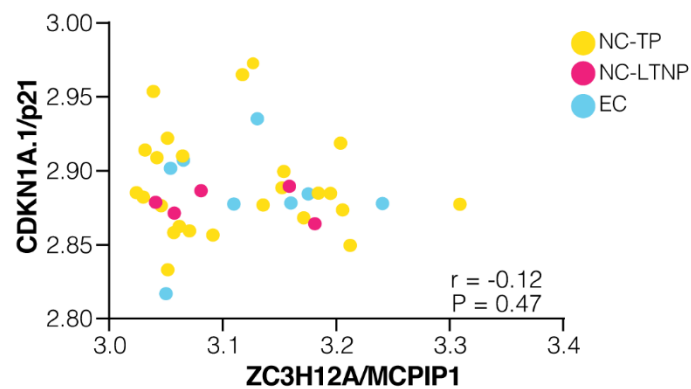

**Figure S9:** ZC3H12A/MCPIP1 and isoform of CDKN1A.1/p21 (probe ILMN\_1787212) are not correlated with CD8<sup>+</sup> T cell in all groups. Correlations were made using the expression data from previous study (GSE28128). The points' colors present in each graph indicate the groups present according to the legend. The correlation coefficient (Spearman's rho) are shown in the bottom right corner.

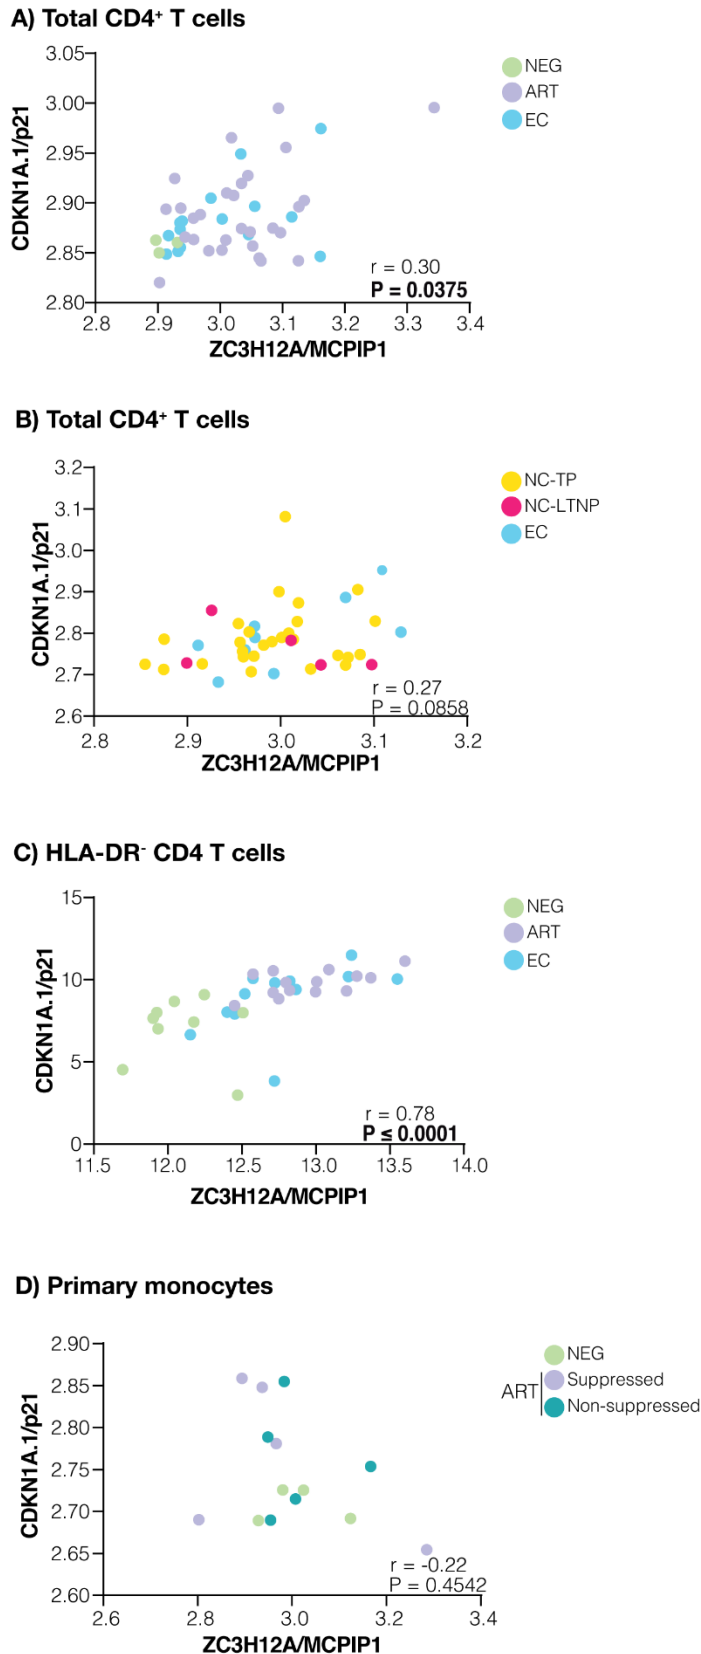

**Figure S10:** Correlations between ZC3H12A/MCPIP1 and isoform CDKN1A.1/p21 (ILMN\_1787212) using the expression data from previous studies in A) and B) Total CD4<sup>+</sup> T cells (GSE18233, GSE28128, respectively), C) HLA-DR<sup>-</sup> CD4 T cells (GSE23879), and D) Primary monocytes (GSE52900). The points' colors present in each graph indicate the groups present according to the legend. The correlation coefficient (Spearman's rho) are shown in the bottom right corner.

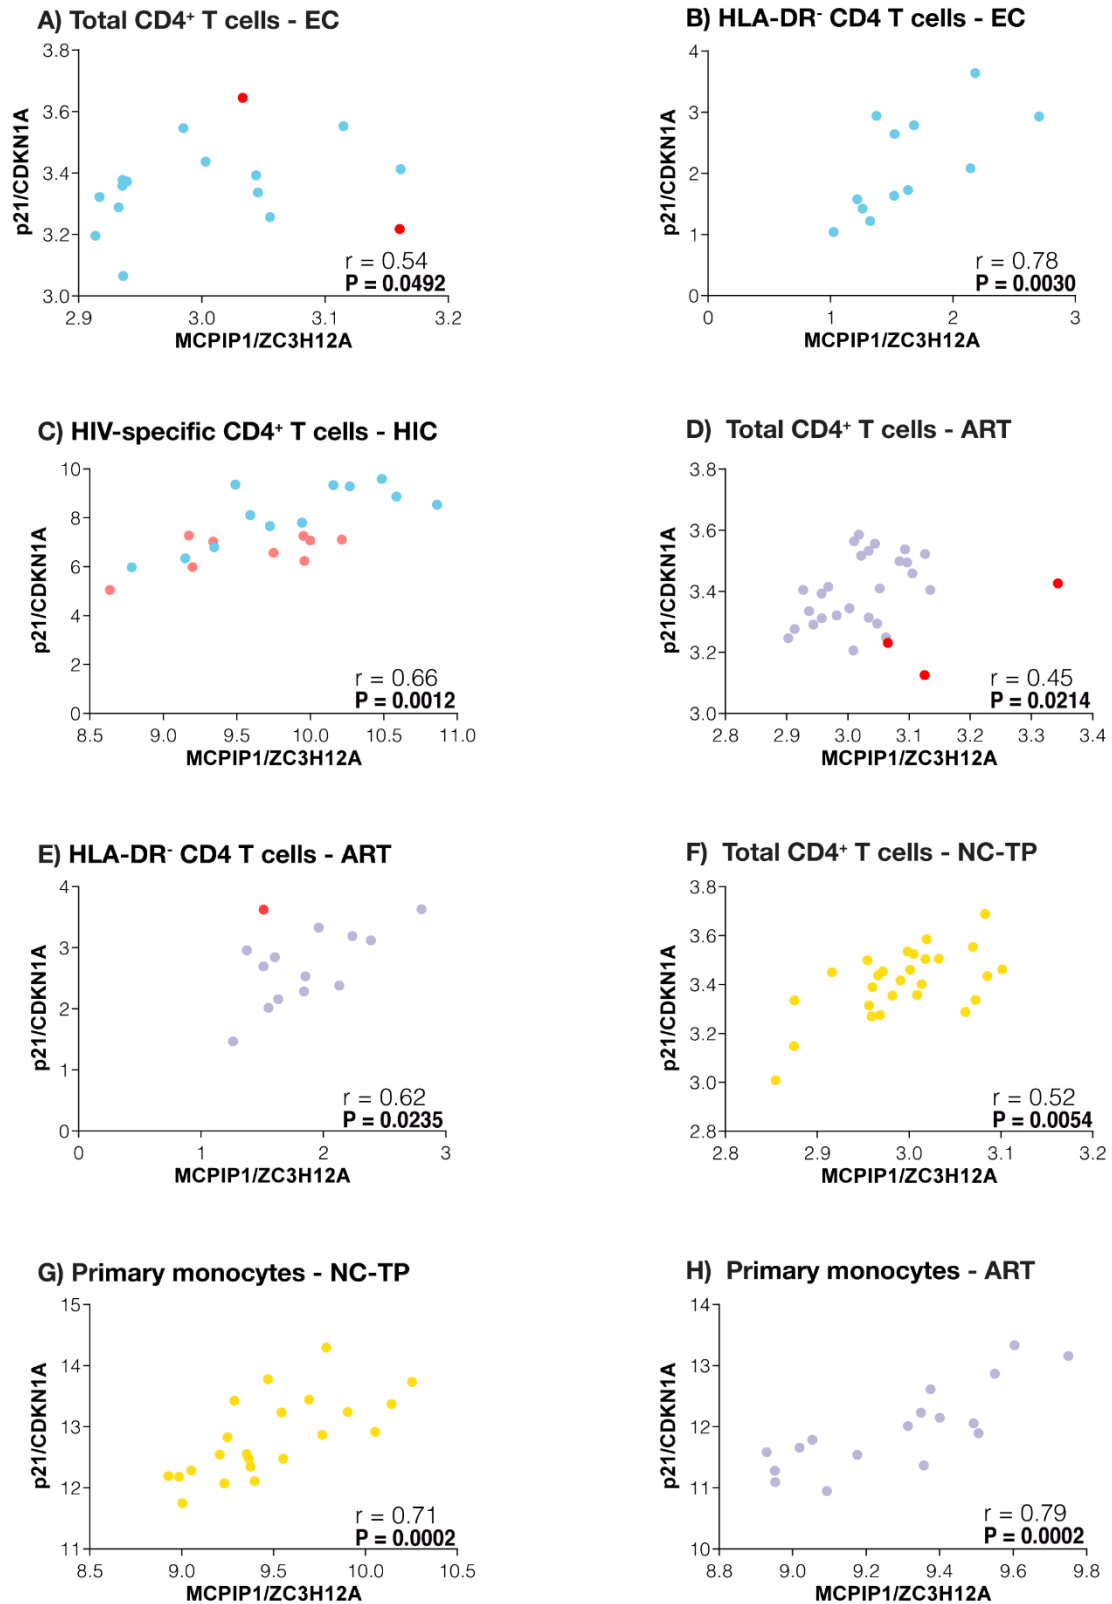

**Figure S11:** Correlations between ZC3H12A/MCPIP1 and CDKN1A/p21 using the expression data from previous studies in A) and D) Total CD4<sup>+</sup> T cells (GSE18233), B) and E) HLA-DR<sup>-</sup> CD4 T cells (GSE23879), C) HIV-specific CD4<sup>+</sup> T cells (GSE129872/128296), F) Total CD4<sup>+</sup> T cells (GSE28128) and G) and H) Primary monocytes (GSE18464). The points were colored following the color pattern of Figure 5. Outliers are showed in red. The correlation coefficient (Spearman's rho) are shown in the bottom right corner.

**Table S1.** Distribution of individuals in different groups according to sex.

| <b>Group</b> | <b>n (%)</b> | <b>Sex (n [%])</b> |             | <b><i>P</i>-value*</b> |
|--------------|--------------|--------------------|-------------|------------------------|
|              |              | <b>Female</b>      | <b>Male</b> |                        |
| NEG          | 10 (25.6)    | 6 (15.4)           | 4 (10.3)    | 0.9083                 |
| ART          | 8 (20.5)     | 4 (10.3)           | 4 (10.3)    |                        |
| HIC          | 21 (53.8)    | 13 (33.3)          | 8 (20.5)    |                        |
| NEG          | 10 (25.6)    | 6 (15.4)           | 4 (10.3)    | 0.3273                 |
| ART          | 8 (20.5)     | 4 (10.3)           | 4 (10.3)    |                        |
| EC           | 13 (33.3)    | 10 (25.6)          | 3 (7.7)     |                        |
| VC           | 8 (20.5)     | 3 (7.7)            | 5 (12.8)    |                        |

\* Statistical analyses were performed using the Fisher exact test.

**Table S2. Differential expression analysis from ZC3H12A and CDKN1A genes in different cell types.**

| GEO accession number                           | Probe ID                                   | Gene symbol  | Cell Type                                    | Groups                                       | logFC            | p-value |       |
|------------------------------------------------|--------------------------------------------|--------------|----------------------------------------------|----------------------------------------------|------------------|---------|-------|
| GSE23879<br>(Vigneault <i>et al.</i> 2011)     | ILMN_1672295                               | ZC3H12A      | HLA-DR <sup>+</sup> CD4 <sup>+</sup> T cells | EC vs ART                                    | 0.19             | 0.186   |       |
|                                                | ILMN_1784602                               | CDKN1A       | HLA-DR <sup>+</sup> CD4 <sup>+</sup> T cells |                                              | 0.41             | 0.029   |       |
|                                                | ILMN_1787212                               | CDKN1A.1     | HLA-DR <sup>+</sup> CD4 <sup>+</sup> T cells |                                              | 0.92             | 0.104   |       |
|                                                | GSE23879<br>(Vigneault <i>et al.</i> 2011) | ILMN_1672295 | ZC3H12A                                      | HLA-DR <sup>+</sup> CD4 <sup>+</sup> T cells | NEG vs EC        | -0.65   | 0.000 |
|                                                |                                            | ILMN_1784602 | CDKN1A                                       | HLA-DR <sup>+</sup> CD4 <sup>+</sup> T cells |                  | -0.99   | 0.000 |
|                                                |                                            | ILMN_1787212 | CDKN1A.1                                     | HLA-DR <sup>+</sup> CD4 <sup>+</sup> T cells |                  | -1.62   | 0.049 |
|                                                |                                            | ILMN_1672295 | ZC3H12A                                      | HLA-DR <sup>+</sup> CD4 <sup>+</sup> T cells |                  | 0.84    | 0.000 |
|                                                | GSE23879<br>(Vigneault <i>et al.</i> 2011) | ILMN_1784602 | CDKN1A                                       | HLA-DR <sup>+</sup> CD4 <sup>+</sup> T cells | ART vs NEG       | 1.41    | 0.000 |
| ILMN_1787212                                   |                                            | CDKN1A.1     | HLA-DR <sup>+</sup> CD4 <sup>+</sup> T cells | 2.54                                         |                  | 0.000   |       |
| ILMN_1672295                                   |                                            | ZC3H12A      | HLA-DR <sup>+</sup> CD4 <sup>+</sup> T cells |                                              |                  |         |       |
| GSE18233<br>(Rotger <i>et al.</i> 2010)        | ILMN_1672295                               | ZC3H12A      | Total CD4 <sup>+</sup> T cells               | EC vs ART                                    | -0.13            | 0.322   |       |
|                                                | ILMN_1784602                               | CDKN1A       | Total CD4 <sup>+</sup> T cells               |                                              | -0.18            | 0.527   |       |
|                                                | ILMN_1787212                               | CDKN1A.1     | Total CD4 <sup>+</sup> T cells               |                                              | -0.05            | 0.525   |       |
|                                                | GSE18233<br>(Rotger <i>et al.</i> 2010)    | ILMN_1672295 | ZC3H12A                                      | Total CD4 <sup>+</sup> T cells               | NEG vs EC        | -0.58   | 0.003 |
|                                                |                                            | ILMN_1784602 | CDKN1A                                       | Total CD4 <sup>+</sup> T cells               |                  | -1.11   | 0.006 |
|                                                |                                            | ILMN_1787212 | CDKN1A.1                                     | Total CD4 <sup>+</sup> T cells               |                  | -0.13   | 0.047 |
|                                                |                                            | ILMN_1672295 | ZC3H12A                                      | Total CD4 <sup>+</sup> T cells               |                  | 0.71    | 0.000 |
|                                                | GSE18233<br>(Rotger <i>et al.</i> 2010)    | ILMN_1784602 | CDKN1A                                       | Total CD4 <sup>+</sup> T cells               | ART vs NEG       | 1.29    | 0.000 |
| ILMN_1787212                                   |                                            | CDKN1A.1     | Total CD4 <sup>+</sup> T cells               | 0.18                                         |                  | 0.036   |       |
| ILMN_1672295                                   |                                            | ZC3H12A      | Total CD4 <sup>+</sup> T cells               |                                              |                  |         |       |
| GSE28128<br>(Rotger <i>et al.</i> 2011)        | ILMN_1672295                               | ZC3H12A      | Total CD4 <sup>+</sup> T cells               | EC vs NC-TP                                  | -0.07            | 0.591   |       |
|                                                | ILMN_1784602                               | CDKN1A       | Total CD4 <sup>+</sup> T cells               |                                              | 0.19             | 0.604   |       |
|                                                | ILMN_1787212                               | CDKN1A.1     | Total CD4 <sup>+</sup> T cells               |                                              | -0.03            | 0.845   |       |
|                                                | GSE28128<br>(Rotger <i>et al.</i> 2011)    | ILMN_1672295 | ZC3H12A                                      | Total CD4 <sup>+</sup> T cells               | EC vs NC-LTNP    | -0.06   | 0.804 |
|                                                |                                            | ILMN_1784602 | CDKN1A                                       | Total CD4 <sup>+</sup> T cells               |                  | 0.11    | 0.838 |
|                                                |                                            | ILMN_1787212 | CDKN1A.1                                     | Total CD4 <sup>+</sup> T cells               |                  | -0.16   | 0.398 |
|                                                |                                            | ILMN_1672295 | ZC3H12A                                      | Total CD4 <sup>+</sup> T cells               |                  | -0.01   | 0.912 |
|                                                | GSE28128<br>(Rotger <i>et al.</i> 2011)    | ILMN_1784602 | CDKN1A                                       | Total CD4 <sup>+</sup> T cells               | NC-LTNP vs NC-TP | 0.08    | 0.856 |
| ILMN_1787212                                   |                                            | CDKN1A.1     | Total CD4 <sup>+</sup> T cells               | 0.13                                         |                  | 0.465   |       |
| ILMN_1672295                                   |                                            | ZC3H12A      | Total CD4 <sup>+</sup> T cells               |                                              |                  |         |       |
| GSE129872/128296<br>(Morou <i>et al.</i> 2019) | TC0100007832.hg.1                          | ZC3H12A      | HIV-specific CD4 <sup>+</sup> T cells        | NC-TP vs EC                                  | -0.66            | 0.007   |       |
|                                                | TC0600007847.hg.1                          | CDKN1A       | HIV-specific CD4 <sup>+</sup> T cells        |                                              | -2.13            | 0.000   |       |
|                                                | TC0100007832.hg.1                          | ZC3H12A      | HIV-specific CD4 <sup>+</sup> T cells        | ART vs EC                                    | -0.60            | 0.017   |       |
|                                                | TC0600007847.hg.1                          | CDKN1A       | HIV-specific CD4 <sup>+</sup> T cells        |                                              | -1.47            | 0.002   |       |
|                                                | TC0100007832.hg.1                          | ZC3H12A      | HIV-specific CD4 <sup>+</sup> T cells        | EC vs VC                                     | -0.28            | 0.249   |       |
|                                                | TC0600007847.hg.1                          | CDKN1A       | HIV-specific CD4 <sup>+</sup> T cells        |                                              | -1.52            | 0.001   |       |
|                                                | TC0100007832.hg.1                          | ZC3H12A      | HIV-specific CD4 <sup>+</sup> T cells        | HIC vs NC-TP                                 | 0.53             | 0.011   |       |
|                                                | TC0600007847.hg.1                          | CDKN1A       | HIV-specific CD4 <sup>+</sup> T cells        |                                              | 1.48             | 0.000   |       |
|                                                | TC0100007832.hg.1                          | ZC3H12A      | HIV-specific CD4 <sup>+</sup> T cells        | NC-TP vs VC                                  | -0.37            | 0.092   |       |
|                                                | TC0600007847.hg.1                          | CDKN1A       | HIV-specific CD4 <sup>+</sup> T cells        |                                              | -0.61            | 0.071   |       |

EC: Elite controllers; ART: Successfully treated-progressor; NEG: HIV negative; NC-TP: Untreated non-controllers typical progressors; NC-LTNP: Untreated long-term nonprogressors; HIC: EC+VC;

**Table S3. List of samples from Rotger et al. 2010 used in this study.**

| <b>GEO accession number</b>             | <b>Barcode</b>                 | <b>Sample Title</b>       | <b>Group</b>                      | <b>Cell Type</b>               |
|-----------------------------------------|--------------------------------|---------------------------|-----------------------------------|--------------------------------|
| GSE18233<br>(Rotger <i>et al.</i> 2010) | GSM455600                      | Untreated 3011            | Elite controller                  | Total CD4 <sup>+</sup> T cells |
|                                         | GSM455601                      | Untreated 3013            | Elite controller                  | Total CD4 <sup>+</sup> T cells |
|                                         | GSM455602                      | Untreated 3130            | Elite controller                  | Total CD4 <sup>+</sup> T cells |
|                                         | GSM455604                      | Untreated 3336            | Elite controller                  | Total CD4 <sup>+</sup> T cells |
|                                         | GSM455609                      | Untreated 3595            | Elite controller                  | Total CD4 <sup>+</sup> T cells |
|                                         | GSM455611                      | Untreated 3713            | Elite controller                  | Total CD4 <sup>+</sup> T cells |
|                                         | GSM455613                      | Untreated 3929            | Elite controller                  | Total CD4 <sup>+</sup> T cells |
|                                         | GSM455615                      | Untreated 5076            | Elite controller                  | Total CD4 <sup>+</sup> T cells |
|                                         | GSM455737                      | Untreated 5539            | Elite controller                  | Total CD4 <sup>+</sup> T cells |
|                                         | GSM455741                      | Untreated 5544            | Elite controller                  | Total CD4 <sup>+</sup> T cells |
|                                         | GSM455616                      | Untreated 5627            | Elite controller                  | Total CD4 <sup>+</sup> T cells |
|                                         | GSM455622                      | Untreated 5646            | Elite controller                  | Total CD4 <sup>+</sup> T cells |
|                                         | GSM455623                      | Untreated 5647            | Elite controller                  | Total CD4 <sup>+</sup> T cells |
|                                         | GSM455644                      | Untreated 5681            | Elite controller                  | Total CD4 <sup>+</sup> T cells |
|                                         | GSM455646                      | Untreated 5683            | Elite controller                  | Total CD4 <sup>+</sup> T cells |
|                                         | GSM455650                      | Untreated 5687            | Elite controller                  | Total CD4 <sup>+</sup> T cells |
|                                         | GSM455596                      | Successfully treated 3073 | Progressor (Successfully treated) | Total CD4 <sup>+</sup> T cells |
|                                         | GSM455659                      | Successfully treated 3085 | Progressor (Successfully treated) | Total CD4 <sup>+</sup> T cells |
|                                         | GSM455661                      | Successfully treated 3149 | Progressor (Successfully treated) | Total CD4 <sup>+</sup> T cells |
|                                         | GSM455662                      | Successfully treated 3152 | Progressor (Successfully treated) | Total CD4 <sup>+</sup> T cells |
|                                         | GSM455672                      | Successfully treated 3307 | Progressor (Successfully treated) | Total CD4 <sup>+</sup> T cells |
|                                         | GSM455674                      | Successfully treated 3477 | Progressor (Successfully treated) | Total CD4 <sup>+</sup> T cells |
|                                         | GSM455582                      | Successfully treated 3487 | Progressor (Successfully treated) | Total CD4 <sup>+</sup> T cells |
|                                         | GSM455583                      | Successfully treated 3862 | Progressor (Successfully treated) | Total CD4 <sup>+</sup> T cells |
|                                         | GSM455683                      | Successfully treated 3937 | Progressor (Successfully treated) | Total CD4 <sup>+</sup> T cells |
|                                         | GSM455687                      | Successfully treated 5136 | Progressor (Successfully treated) | Total CD4 <sup>+</sup> T cells |
|                                         | GSM455688                      | Successfully treated 5140 | Progressor (Successfully treated) | Total CD4 <sup>+</sup> T cells |
|                                         | GSM455696                      | Successfully treated 5483 | Progressor (Successfully treated) | Total CD4 <sup>+</sup> T cells |
|                                         | GSM455698                      | Successfully treated 5490 | Progressor (Successfully treated) | Total CD4 <sup>+</sup> T cells |
|                                         | GSM455703                      | Successfully treated 5496 | Progressor (Successfully treated) | Total CD4 <sup>+</sup> T cells |
|                                         | GSM455708                      | Successfully treated 5499 | Progressor (Successfully treated) | Total CD4 <sup>+</sup> T cells |
|                                         | GSM455725                      | Successfully treated 5520 | Progressor (Successfully treated) | Total CD4 <sup>+</sup> T cells |
|                                         | GSM455594                      | Successfully treated 5567 | Progressor (Successfully treated) | Total CD4 <sup>+</sup> T cells |
|                                         | GSM455766                      | Successfully treated 5619 | Progressor (Successfully treated) | Total CD4 <sup>+</sup> T cells |
|                                         | GSM455768                      | Successfully treated 5622 | Progressor (Successfully treated) | Total CD4 <sup>+</sup> T cells |
|                                         | GSM455772                      | Successfully treated 5628 | Progressor (Successfully treated) | Total CD4 <sup>+</sup> T cells |
|                                         | GSM455617                      | Successfully treated 5633 | Progressor (Successfully treated) | Total CD4 <sup>+</sup> T cells |
|                                         | GSM455618                      | Successfully treated 5637 | Progressor (Successfully treated) | Total CD4 <sup>+</sup> T cells |
|                                         | GSM455628                      | Successfully treated 5652 | Progressor (Successfully treated) | Total CD4 <sup>+</sup> T cells |
|                                         | GSM455629                      | Successfully treated 5659 | Progressor (Successfully treated) | Total CD4 <sup>+</sup> T cells |
|                                         | GSM455637                      | Successfully treated 5672 | Progressor (Successfully treated) | Total CD4 <sup>+</sup> T cells |
|                                         | GSM455648                      | Successfully treated 5685 | Progressor (Successfully treated) | Total CD4 <sup>+</sup> T cells |
|                                         | GSM455653                      | Successfully treated 5699 | Progressor (Successfully treated) | Total CD4 <sup>+</sup> T cells |
|                                         | GSM455656                      | Successfully treated 5703 | Progressor (Successfully treated) | Total CD4 <sup>+</sup> T cells |
|                                         | GSM455657                      | Successfully treated 5704 | Progressor (Successfully treated) | Total CD4 <sup>+</sup> T cells |
| GSM455777                               | Uninfected_rep1 pull 2 ATE 105 | HIV negative              | Total CD4 <sup>+</sup> T cells    |                                |
| GSM455779                               | Uninfected_rep1 pull 3_ATE 048 | HIV negative              | Total CD4 <sup>+</sup> T cells    |                                |
| GSM455774                               | Uninfected_rep2 pull 1_ATE 078 | HIV negative              | Total CD4 <sup>+</sup> T cells    |                                |
| GSM455778                               | Uninfected_rep2 pull 2_ATE 108 | HIV negative              | Total CD4 <sup>+</sup> T cells    |                                |
| GSM455780                               | Uninfected_rep2 pull 3_ATE 051 | HIV negative              | Total CD4 <sup>+</sup> T cells    |                                |
| GSM455775                               | Uninfected_rep3 pull 2_ATE 196 | HIV negative              | Total CD4 <sup>+</sup> T cells    |                                |
| GSM455781                               | Uninfected_rep3 pull 3 ATE 057 | HIV negative              | Total CD4 <sup>+</sup> T cells    |                                |
| GSM455776                               | Uninfected_rep1 pull 2 ATE 105 | HIV negative              | Total CD4 <sup>+</sup> T cells    |                                |

**Table S4. List of samples from Vigneault et al. 2011 used in this study.**

| <b>GEO accession number</b>                | <b>Barcode</b> | <b>Sample Title</b> | <b>Group</b>     | <b>Cell Type</b>                |
|--------------------------------------------|----------------|---------------------|------------------|---------------------------------|
| GSE23879<br>(Vigneault <i>et al.</i> 2011) | GSM588887      | CD4 EC 01           | Elite controller | HLA-DR <sup>+</sup> CD4 T cells |
|                                            | GSM588888      | CD4 EC 02           | Elite controller | HLA-DR <sup>+</sup> CD4 T cells |
|                                            | GSM588889      | CD4 EC 03           | Elite controller | HLA-DR <sup>+</sup> CD4 T cells |
|                                            | GSM588890      | CD4 EC 04           | Elite controller | HLA-DR <sup>+</sup> CD4 T cells |
|                                            | GSM588891      | CD4 EC 05           | Elite controller | HLA-DR <sup>+</sup> CD4 T cells |
|                                            | GSM588892      | CD4 EC 06           | Elite controller | HLA-DR <sup>+</sup> CD4 T cells |
|                                            | GSM588893      | CD4 EC 07           | Elite controller | HLA-DR <sup>+</sup> CD4 T cells |
|                                            | GSM588894      | CD4 EC 08           | Elite controller | HLA-DR <sup>+</sup> CD4 T cells |
|                                            | GSM588895      | CD4 EC 09           | Elite controller | HLA-DR <sup>+</sup> CD4 T cells |
|                                            | GSM588896      | CD4 EC 10           | Elite controller | HLA-DR <sup>+</sup> CD4 T cells |
|                                            | GSM588897      | CD4 EC 11           | Elite controller | HLA-DR <sup>+</sup> CD4 T cells |
|                                            | GSM588898      | CD4 EC 12           | Elite controller | HLA-DR <sup>+</sup> CD4 T cells |
|                                            | GSM588911      | CD4 HIV+ 01         | ART Treated      | HLA-DR <sup>+</sup> CD4 T cells |
|                                            | GSM588912      | CD4 HIV+ 02         | ART Treated      | HLA-DR <sup>+</sup> CD4 T cells |
|                                            | GSM588913      | CD4 HIV+ 03         | ART Treated      | HLA-DR <sup>+</sup> CD4 T cells |
|                                            | GSM588914      | CD4 HIV+ 04         | ART Treated      | HLA-DR <sup>+</sup> CD4 T cells |
|                                            | GSM588915      | CD4 HIV+ 05         | ART Treated      | HLA-DR <sup>+</sup> CD4 T cells |
|                                            | GSM588916      | CD4 HIV+ 06         | ART Treated      | HLA-DR <sup>+</sup> CD4 T cells |
|                                            | GSM588917      | CD4 HIV+ 07         | ART Treated      | HLA-DR <sup>+</sup> CD4 T cells |
|                                            | GSM588918      | CD4 HIV+ 08         | ART Treated      | HLA-DR <sup>+</sup> CD4 T cells |
|                                            | GSM588919      | CD4 HIV+ 09         | ART Treated      | HLA-DR <sup>+</sup> CD4 T cells |
|                                            | GSM588920      | CD4 HIV+ 10         | ART Treated      | HLA-DR <sup>+</sup> CD4 T cells |
|                                            | GSM588921      | CD4 HIV+ 11         | ART Treated      | HLA-DR <sup>+</sup> CD4 T cells |
|                                            | GSM588922      | CD4 HIV+ 12         | ART Treated      | HLA-DR <sup>+</sup> CD4 T cells |
|                                            | GSM588923      | CD4 HIV+ 13_repl1   | ART Treated      | HLA-DR <sup>+</sup> CD4 T cells |
|                                            | GSM588924      | CD4 HIV+ 13_repl2   | ART Treated      | HLA-DR <sup>+</sup> CD4 T cells |
|                                            | GSM588925      | CD4 HIV+ 15         | ART Treated      | HLA-DR <sup>+</sup> CD4 T cells |
|                                            | GSM588899      | CD4 HIV- 01         | HIV negative     | HLA-DR <sup>+</sup> CD4 T cells |
|                                            | GSM588900      | CD4 HIV- 02         | HIV negative     | HLA-DR <sup>+</sup> CD4 T cells |
|                                            | GSM588901      | CD4 HIV- 03_repl1   | HIV negative     | HLA-DR <sup>+</sup> CD4 T cells |
|                                            | GSM588902      | CD4 HIV- 03_repl2   | HIV negative     | HLA-DR <sup>+</sup> CD4 T cells |
|                                            | GSM588903      | CD4 HIV- 04         | HIV negative     | HLA-DR <sup>+</sup> CD4 T cells |
|                                            | GSM588904      | CD4 HIV- 05         | HIV negative     | HLA-DR <sup>+</sup> CD4 T cells |
|                                            | GSM588905      | CD4 HIV- 06         | HIV negative     | HLA-DR <sup>+</sup> CD4 T cells |
|                                            | GSM588906      | CD4 HIV- 07_repl1   | HIV negative     | HLA-DR <sup>+</sup> CD4 T cells |
|                                            | GSM588907      | CD4 HIV- 07_repl2   | HIV negative     | HLA-DR <sup>+</sup> CD4 T cells |
|                                            | GSM588908      | CD4 HIV- 08_repl1   | HIV negative     | HLA-DR <sup>+</sup> CD4 T cells |
|                                            | GSM588909      | CD4 HIV- 08_repl2   | HIV negative     | HLA-DR <sup>+</sup> CD4 T cells |
|                                            | GSM588910      | CD4 HIV- 09         | HIV negative     | HLA-DR <sup>+</sup> CD4 T cells |



**Table S5. List of samples from Rotger et al. 2011 used in this study**

| <b>GEO accession number</b>             | <b>Barcode</b> | <b>Sample Title</b>    | <b>Group</b>                   | <b>Cell Type</b>               |
|-----------------------------------------|----------------|------------------------|--------------------------------|--------------------------------|
| GSE28128<br>(Rotger <i>et al.</i> 2011) | GSM696900      | EC_3011                | Elite controller               | Total CD4 <sup>+</sup> T cells |
|                                         | GSM696901      | EC_3336                | Elite controller               | Total CD4 <sup>+</sup> T cells |
|                                         | GSM696902      | EC_3713                | Elite controller               | Total CD4 <sup>+</sup> T cells |
|                                         | GSM696903      | EC_3984                | Elite controller               | Total CD4 <sup>+</sup> T cells |
|                                         | GSM696904      | EC_5563                | Elite controller               | Total CD4 <sup>+</sup> T cells |
|                                         | GSM696905      | EC_5627                | Elite controller               | Total CD4 <sup>+</sup> T cells |
|                                         | GSM696906      | EC_5647                | Elite controller               | Total CD4 <sup>+</sup> T cells |
|                                         | GSM696907      | EC_5681                | Elite controller               | Total CD4 <sup>+</sup> T cells |
|                                         | GSM696908      | EC_5683                | Elite controller               | Total CD4 <sup>+</sup> T cells |
|                                         | GSM696909      | *RP_3079               | Rapid Progressor               | Total CD4 <sup>+</sup> T cells |
|                                         | GSM696910      | RP_3997                | Rapid Progressor               | Total CD4 <sup>+</sup> T cells |
|                                         | GSM696911      | RP_5484                | Rapid Progressor               | Total CD4 <sup>+</sup> T cells |
|                                         | GSM696912      | RP_5506                | Rapid Progressor               | Total CD4 <sup>+</sup> T cells |
|                                         | GSM696913      | RP_5537                | Rapid Progressor               | Total CD4 <sup>+</sup> T cells |
|                                         | GSM696914      | RP_5619                | Rapid Progressor               | Total CD4 <sup>+</sup> T cells |
|                                         | GSM696915      | RP_5643                | Rapid Progressor               | Total CD4 <sup>+</sup> T cells |
|                                         | GSM696916      | RP_5685                | Rapid Progressor               | Total CD4 <sup>+</sup> T cells |
|                                         | GSM696917      | RP_7777                | Rapid Progressor               | Total CD4 <sup>+</sup> T cells |
|                                         | GSM696918      | RP_7781                | Rapid Progressor               | Total CD4 <sup>+</sup> T cells |
|                                         | GSM696919      | RP_7783                | Rapid Progressor               | Total CD4 <sup>+</sup> T cells |
|                                         | GSM696920      | RP_HC13                | Rapid Progressor               | Total CD4 <sup>+</sup> T cells |
|                                         | GSM696921      | RP_HC16                | Rapid Progressor               | Total CD4 <sup>+</sup> T cells |
|                                         | GSM696922      | RP_IC330               | Rapid Progressor               | Total CD4 <sup>+</sup> T cells |
|                                         | GSM696923      | RP_IC436               | Rapid Progressor               | Total CD4 <sup>+</sup> T cells |
|                                         | GSM696924      | RP_IC443               | Rapid Progressor               | Total CD4 <sup>+</sup> T cells |
|                                         | GSM696925      | RP_IC450               | Rapid Progressor               | Total CD4 <sup>+</sup> T cells |
|                                         | GSM696926      | RP_IC458               | Rapid Progressor               | Total CD4 <sup>+</sup> T cells |
|                                         | GSM696927      | RP_IC519               | Rapid Progressor               | Total CD4 <sup>+</sup> T cells |
|                                         | GSM696928      | RP_IC527               | Rapid Progressor               | Total CD4 <sup>+</sup> T cells |
|                                         | GSM696929      | RP_IC548               | Rapid Progressor               | Total CD4 <sup>+</sup> T cells |
|                                         | GSM696930      | RP_IC590               | Rapid Progressor               | Total CD4 <sup>+</sup> T cells |
|                                         | GSM696931      | RP_IC654               | Rapid Progressor               | Total CD4 <sup>+</sup> T cells |
|                                         | GSM696932      | RP_IC678               | Rapid Progressor               | Total CD4 <sup>+</sup> T cells |
|                                         | GSM696933      | RP_IC699               | Rapid Progressor               | Total CD4 <sup>+</sup> T cells |
|                                         | GSM696934      | RP_IC720               | Rapid Progressor               | Total CD4 <sup>+</sup> T cells |
|                                         | GSM696935      | RP_IC760               | Rapid Progressor               | Total CD4 <sup>+</sup> T cells |
|                                         | GSM696936      | *VNP_6109              | Viremic non-progressor         | Total CD4 <sup>+</sup> T cells |
|                                         | GSM696937      | VNP_6309               | Viremic non-progressor         | Total CD4 <sup>+</sup> T cells |
|                                         | GSM696938      | VNP_7843               | Viremic non-progressor         | Total CD4 <sup>+</sup> T cells |
|                                         | GSM696939      | VNP_7852               | Viremic non-progressor         | Total CD4 <sup>+</sup> T cells |
| GSM696940                               | VNP_IC820      | Viremic non-progressor | Total CD4 <sup>+</sup> T cells |                                |

\*RP and VPN were renamed to NC-TP and NC-LTNP, respectively in our study.

**Table S6. List of samples from Morou et al. 2019 used in this study**

| GEO accession number                           | Barcode    | Sample Title | Group                             | Cell Type                             |
|------------------------------------------------|------------|--------------|-----------------------------------|---------------------------------------|
| GSE129872/128296<br>(Morou <i>et al.</i> 2019) | GSM3723802 | EC1          | Elite controller                  | HIV-specific CD4 <sup>+</sup> T cells |
|                                                | GSM3723803 | EC2          | Elite controller                  | HIV-specific CD4 <sup>+</sup> T cells |
|                                                | GSM3723804 | EC4          | Elite controller                  | HIV-specific CD4 <sup>+</sup> T cells |
|                                                | GSM3723805 | EC5          | Elite controller                  | HIV-specific CD4 <sup>+</sup> T cells |
|                                                | GSM3723806 | EC7          | Elite controller                  | HIV-specific CD4 <sup>+</sup> T cells |
|                                                | GSM3723807 | EC8          | Elite controller                  | HIV-specific CD4 <sup>+</sup> T cells |
|                                                | GSM3723808 | EC9          | Elite controller                  | HIV-specific CD4 <sup>+</sup> T cells |
|                                                | GSM3723809 | EC10         | Elite controller                  | HIV-specific CD4 <sup>+</sup> T cells |
|                                                | GSM3723810 | EC11         | Elite controller                  | HIV-specific CD4 <sup>+</sup> T cells |
|                                                | GSM3723811 | EC12         | Elite controller                  | HIV-specific CD4 <sup>+</sup> T cells |
|                                                | GSM3723812 | EC13         | Elite controller                  | HIV-specific CD4 <sup>+</sup> T cells |
|                                                | GSM3723813 | EC15         | Elite controller                  | HIV-specific CD4 <sup>+</sup> T cells |
|                                                | GSM3723793 | VC1          | Viremic controller                | HIV-specific CD4 <sup>+</sup> T cells |
|                                                | GSM3723794 | VC2          | Viremic controller                | HIV-specific CD4 <sup>+</sup> T cells |
|                                                | GSM3723795 | VC3          | Viremic controller                | HIV-specific CD4 <sup>+</sup> T cells |
|                                                | GSM3723796 | VC6          | Viremic controller                | HIV-specific CD4 <sup>+</sup> T cells |
|                                                | GSM3723797 | VC8          | Viremic controller                | HIV-specific CD4 <sup>+</sup> T cells |
|                                                | GSM3723798 | VC9          | Viremic controller                | HIV-specific CD4 <sup>+</sup> T cells |
|                                                | GSM3723799 | VC10         | Viremic controller                | HIV-specific CD4 <sup>+</sup> T cells |
|                                                | GSM3723800 | VC11         | Viremic controller                | HIV-specific CD4 <sup>+</sup> T cells |
|                                                | GSM3723801 | VC12         | Viremic controller                | HIV-specific CD4 <sup>+</sup> T cells |
|                                                | GSM3723782 | *CP1         | Chronic progressor                | HIV-specific CD4 <sup>+</sup> T cells |
|                                                | GSM3723783 | CP2          | Chronic progressor                | HIV-specific CD4 <sup>+</sup> T cells |
|                                                | GSM3723784 | CP3          | Chronic progressor                | HIV-specific CD4 <sup>+</sup> T cells |
|                                                | GSM3723785 | CP5          | Chronic progressor                | HIV-specific CD4 <sup>+</sup> T cells |
|                                                | GSM3723786 | CP6          | Chronic progressor                | HIV-specific CD4 <sup>+</sup> T cells |
|                                                | GSM3723787 | CP7          | Chronic progressor                | HIV-specific CD4 <sup>+</sup> T cells |
|                                                | GSM3723788 | CP8          | Chronic progressor                | HIV-specific CD4 <sup>+</sup> T cells |
|                                                | GSM3723789 | CP9          | Chronic progressor                | HIV-specific CD4 <sup>+</sup> T cells |
|                                                | GSM3723790 | CP10         | Chronic progressor                | HIV-specific CD4 <sup>+</sup> T cells |
|                                                | GSM3723791 | CP11         | Chronic progressor                | HIV-specific CD4 <sup>+</sup> T cells |
|                                                | GSM3723792 | CP12         | Chronic progressor                | HIV-specific CD4 <sup>+</sup> T cells |
|                                                | GSM3670818 | CP1_postART  | Progressor (Successfully treated) | HIV-specific CD4 <sup>+</sup> T cells |
|                                                | GSM3670819 | CP3_postART  | Progressor (Successfully treated) | HIV-specific CD4 <sup>+</sup> T cells |
|                                                | GSM3670820 | CP6_postART  | Progressor (Successfully treated) | HIV-specific CD4 <sup>+</sup> T cells |
|                                                | GSM3670821 | CP8_postART  | Progressor (Successfully treated) | HIV-specific CD4 <sup>+</sup> T cells |
|                                                | GSM3670822 | CP10_postART | Progressor (Successfully treated) | HIV-specific CD4 <sup>+</sup> T cells |
|                                                | GSM3670823 | CP11_postART | Progressor (Successfully treated) | HIV-specific CD4 <sup>+</sup> T cells |
|                                                | GSM3670824 | CP13_postART | Progressor (Successfully treated) | HIV-specific CD4 <sup>+</sup> T cells |
|                                                | GSM3670825 | CP14_postART | Progressor (Successfully treated) | HIV-specific CD4 <sup>+</sup> T cells |

CP and CP\_postART were renamed to NC-TP and ART, respectively in our study.

**Table S7. List of samples from Wu et al. 2013 used in this study.**

| <b>GEO accession number</b>         | <b>Barcode</b> | <b>Sample Title</b> | <b>Group</b>              | <b>Cell Type</b>  |
|-------------------------------------|----------------|---------------------|---------------------------|-------------------|
| GSE52900<br>(Wu <i>et al.</i> 2013) | GSM1277694     | BDL_biorep1*        | ART_Below Detection Level | Primary monocytes |
|                                     | GSM1277695     | BDL_biorep2         | ART_Below Detection Level | Primary monocytes |
|                                     | GSM1277696     | BDL_biorep3         | ART_Below Detection Level | Primary monocytes |
|                                     | GSM1277697     | BDL_biorep4         | ART_Below Detection Level | Primary monocytes |
|                                     | GSM1277698     | BDL_biorep5         | ART_Below Detection Level | Primary monocytes |
|                                     | GSM1277699     | VIR_biorep1*        | ART_experiencing viremia  | Primary monocytes |
|                                     | GSM1277700     | VIR_biorep2         | ART_experiencing viremia  | Primary monocytes |
|                                     | GSM1277701     | VIR_biorep3         | ART_experiencing viremia  | Primary monocytes |
|                                     | GSM1277702     | VIR_biorep4         | ART_experiencing viremia  | Primary monocytes |
|                                     | GSM1277703     | VIR_biorep5         | ART_experiencing viremia  | Primary monocytes |
|                                     | GSM1277704     | ctrl_biorep1        | HIV Negative              | Primary monocytes |
|                                     | GSM1277705     | ctrl_biorep2        | HIV Negative              | Primary monocytes |
|                                     | GSM1277706     | ctrl_biorep3        | HIV Negative              | Primary monocytes |
|                                     | GSM1277707     | ctrl_biorep4        | HIV Negative              | Primary monocytes |

\*BDL and VIR were renamed to ART-suppressed and ART non-suppressed, respectively in our study.

**Table S8. List of samples from Rempel et al. 2010 used in this study.**

| GEO accession number                    | Barcode        | Sample Title      | Group             | Cell Type         |
|-----------------------------------------|----------------|-------------------|-------------------|-------------------|
| GSE18464<br>(Rempel <i>et al.</i> 2010) | GSM361177      | Monocyte_LVL*_002 | Low-viral loads   | Primary monocytes |
|                                         | GSM361179      | Monocyte_LVL_004  | Low-viral loads   | Primary monocytes |
|                                         | GSM361180      | Monocyte_LVL_005  | Low-viral loads   | Primary monocytes |
|                                         | GSM361181      | Monocyte_LVL_006  | Low-viral loads   | Primary monocytes |
|                                         | GSM361182      | Monocyte_LVL_007  | Low-viral loads   | Primary monocytes |
|                                         | GSM361186      | Monocyte_LVL_013  | Low-viral loads   | Primary monocytes |
|                                         | GSM361193      | Monocyte_LVL_021  | Low-viral loads   | Primary monocytes |
|                                         | GSM361198      | Monocyte_LVL_028  | Low-viral loads   | Primary monocytes |
|                                         | GSM361200      | Monocyte_LVL_030  | Low-viral loads   | Primary monocytes |
|                                         | GSM361202      | Monocyte_LVL_032  | Low-viral loads   | Primary monocytes |
|                                         | GSM361212      | Monocyte_LVL_043  | Low-viral loads   | Primary monocytes |
|                                         | GSM361214      | Monocyte_LVL_046  | Low-viral loads   | Primary monocytes |
|                                         | GSM361215      | Monocyte_LVL_048  | Low-viral loads   | Primary monocytes |
|                                         | GSM361217      | Monocyte_LVL_050  | Low-viral loads   | Primary monocytes |
|                                         | GSM361218      | Monocyte_LVL_051  | Low-viral loads   | Primary monocytes |
|                                         | GSM361222      | Monocyte_LVL_057  | Low-viral loads   | Primary monocytes |
|                                         | GSM361230      | Monocyte_LVL_067  | Low-viral loads   | Primary monocytes |
|                                         | GSM361176      | Monocyte_HVL*_001 | High-viral loads  | Primary monocytes |
|                                         | GSM361178      | Monocyte_HVL_003  | High-viral loads  | Primary monocytes |
|                                         | GSM361183      | Monocyte_HVL_008  | High-viral loads  | Primary monocytes |
|                                         | GSM361184      | Monocyte_HVL_009  | High-viral loads  | Primary monocytes |
|                                         | GSM361185      | Monocyte_HVL_012  | High-viral loads  | Primary monocytes |
|                                         | GSM361187      | Monocyte_HVL_014  | High-viral loads  | Primary monocytes |
|                                         | GSM361189      | Monocyte_HVL_016  | High-viral loads  | Primary monocytes |
|                                         | GSM361190      | Monocyte_HVL_017  | High-viral loads  | Primary monocytes |
|                                         | GSM361191      | Monocyte_HVL_019  | High-viral loads  | Primary monocytes |
|                                         | GSM361192      | Monocyte_HVL_020  | High-viral loads  | Primary monocytes |
|                                         | GSM361194      | Monocyte_HVL_022  | High-viral loads  | Primary monocytes |
|                                         | GSM361195      | Monocyte_HVL_025  | High-viral loads  | Primary monocytes |
|                                         | GSM361196      | Monocyte_HVL_026  | High-viral loads  | Primary monocytes |
|                                         | GSM361203      | Monocyte_HVL_034  | High-viral loads  | Primary monocytes |
|                                         | GSM361205      | Monocyte_HVL_036  | High-viral loads  | Primary monocytes |
|                                         | GSM361208      | Monocyte_HVL_039  | High-viral loads  | Primary monocytes |
|                                         | GSM361209      | Monocyte_HVL_040  | High-viral loads  | Primary monocytes |
|                                         | GSM361210      | Monocyte_HVL_041  | High-viral loads  | Primary monocytes |
|                                         | GSM361219      | Monocyte_HVL_053  | High-viral loads  | Primary monocytes |
|                                         | GSM361220      | Monocyte_HVL_054  | High-viral loads  | Primary monocytes |
|                                         | GSM361221      | Monocyte_HVL_056  | High-viral loads  | Primary monocytes |
|                                         | GSM361223      | Monocyte_HVL_058  | High-viral loads  | Primary monocytes |
|                                         | GSM361188      | Monocyte_C_015    | HIV Negative      | Primary monocytes |
|                                         | GSM361197      | Monocyte_C_027    | HIV Negative      | Primary monocytes |
|                                         | GSM361199      | Monocyte_C_029    | HIV Negative      | Primary monocytes |
|                                         | GSM361201      | Monocyte_C_031    | HIV Negative      | Primary monocytes |
|                                         | GSM361204      | Monocyte_C_035    | HIV Negative      | Primary monocytes |
|                                         | GSM361206      | Monocyte_C_037    | HIV Negative      | Primary monocytes |
|                                         | GSM361207      | Monocyte_C_038    | HIV Negative      | Primary monocytes |
|                                         | GSM361211      | Monocyte_C_042    | HIV Negative      | Primary monocytes |
|                                         | GSM361213      | Monocyte_C_044    | HIV Negative      | Primary monocytes |
| GSM361226                               | Monocyte_C_061 | HIV Negative      | Primary monocytes |                   |
| GSM361228                               | Monocyte_C_063 | HIV Negative      | Primary monocytes |                   |

\*LVL and HVL were renamed to ART-suppressed and NC-TP, respectively in our study.
